# Supplementary material for: Meta-analysis reveals the vaginal microbiome is a better predictor of earlier than later preterm birth
Source: PubMed Central journal article supplement (PMC10518966; doi:10.1186/s12915-023-01702-2), 2023-09-25
Supplement: 12915_2023_1702_MOESM4_ESM.pdf [file 12915_2023_1702_MOESM4_ESM.pdf]

# Supplementary Methods

## Classifiers

We implemented the following classifiers in the machine learning framework and compared their performance: (1) random forest; (2) logistic regression; (3) L1-regularized (LASSO) logistic regression; (4) L2-regularized (Ridge) logistic regression; (5) Elastic net regularized logistic regression. Random forest was implemented using the randomForest R package with 1000 trees. The hyperparameter 'mtry' (number of variables randomly sampled as candidates at each split) was tuned using the caret R package with repeated cross-validation. Logistic regression was implemented using the glm function in R. The regularized logistic regression models were implemented using the glmnet R package. The hyperparameter 'lambda' in the LASSO and Ridge models was tuned using the cv.glmnet function. The hyperparameters 'alpha' and 'lambda' were tuned using the caret R package with repeated cross-validation.

## Bayesian Approach

Let  $G = 1$  if a genus is present (relative abundance  $> 0.001$ ) and 0 if absent,  $B = 1$  if a women has preterm birth (PTB) and 0 if term birth. We can have the conditional probability of PTB giving a genus is absent for dataset  $i$  to be

$$p_i(B = 1|G = 0) = p_i^0 = \frac{u_i}{1 + u_i}$$

where  $u_i$  is the odds of PTB giving a genus is absent for dataset  $i$ .

Define  $r$  as the odds ratio between a genus is present and absent and it is the same for different datasets. Thus, the conditional probability of PTB giving a genus is present for dataset  $i$  can be written as

$$p_i(B = 1|G = 1) = p_i^1 = \frac{u_i r}{1 + u_i r}$$

We assume both  $u_i$  and  $r$  have prior distributions,  $p(u_i)$  and  $p(r)$ , respectively. We are interested in calculating the posterior distribution of  $r$ . Given dataset  $i$ , let  $N_i$  is the total number of subjects in study  $i$ ,  $n_i$  is the number of subjects that with certain genus present.  $M_i$  is the number of PTB subjects in study  $i$ ,  $m_i$  is the number of PTB subjects that with certain genus present. Thus, we can have the likelihood function

$$\begin{aligned} p(N_i, n_i, M_i, m_i | u_i, r) &= (p_i^0)^{M_i - m_i} (1 - p_i^0)^{(N_i - n_i) - (M_i - m_i)} (p_i^1)^{m_i} (1 - p_i^1)^{n_i - m_i} \\ &= \frac{u_i^{M_i - m_i}}{(1 + u_i)^{N_i - n_i}} * \frac{(u_i r)^{m_i}}{(1 + u_i r)^{n_i}} \\ &= \frac{u_i^{M_i} r^{m_i}}{(1 + u_i)^{N_i - n_i} (1 + u_i r)^{n_i}} \end{aligned} \quad (1)$$

Thus, the posterior distribution of  $u_i$  and  $r$  can be written as

$$\begin{aligned} p(u_i, r | N_i, n_i, M_i, m_i) &= \frac{p(N_i, n_i, M_i, m_i | u_i, r) p(u_i, r)}{p(N_i, n_i, M_i, m_i)} \\ &= \frac{p(N_i, n_i, M_i, m_i | u_i, r) p(u_i) p(r)}{\int_{u_i} \int_r p(N_i, n_i, M_i, m_i | u_i, r) p(u_i) p(r)} \end{aligned} \quad (2)$$

Furthermore, we can integrate out  $u_i$  and obtain the posterior distribution for odds ratio  $r$ ,

$$\begin{aligned} p(r | N_i, n_i, M_i, m_i) &= \int_{u_i} p(u_i, r | N_i, n_i, M_i, m_i) \\ &= \frac{p(r) \int_{u_i} p(N_i, n_i, M_i, m_i | u_i, r) p(u_i)}{\int_{u_i} \int_r p(N_i, n_i, M_i, m_i | u_i, r) p(u_i) p(r)} \end{aligned} \quad (3)$$

We assume the  $\log(u_i)$  follows a uniform prior distribution for each dataset. For  $r$ , we let the first dataset has the uniform prior distribution, then calculate the posterior distribution of  $r$ . Next we let the posterior distribution of the odds ratio from the first dataset be the prior distribution for the second dataset, and update the posterior distribution of  $r$ . Repeated the process until the last dataset and obtain the final posterior distribution of  $r$ .
